# Supplementary material
Source: HighWire-hosted journal article supplement (https://bmjopen.bmj.com/content/13/3/e069314)
Supplement: inline-supplementary-material-2 [file inline-supplementary-material-2.pdf]

## Consent Form

Mr./Ms.

**Title: Multicenter randomized controlled trial of the safety and efficacy of intravenous paracetamol in the treatment of patent ductus arteriosus in preterm infants**

(Principal investigator: \_\_\_\_\_ )

[Explanatory notes]

- |                                                                                            |                                                                                                    |
|--------------------------------------------------------------------------------------------|----------------------------------------------------------------------------------------------------|
| <input type="checkbox"/> Clinical trial in which cooperation is requested                  | <input type="checkbox"/> Disclosure of information on this clinical trial                          |
| <input type="checkbox"/> Research organization for this clinical trial                     | <input type="checkbox"/> Privacy protection                                                        |
| <input type="checkbox"/> Purpose and significance of this clinical trial                   | <input type="checkbox"/> Methods of storage and use and storage periods of samples and information |
| <input type="checkbox"/> Who can and cannot participate in this clinical trial             | <input type="checkbox"/> Research funding sources and conflict of interest                         |
| <input type="checkbox"/> If you do not wish to participate in this clinical trial          | <input type="checkbox"/> Contact details for inquiries about this clinical trial                   |
| <input type="checkbox"/> Methods of this clinical trial                                    | <input type="checkbox"/> Cost for participation in this clinical trial                             |
| <input type="checkbox"/> Expected benefits and possible disadvantages                      | <input type="checkbox"/> If this clinical trial results in a health hazard                         |
| <input type="checkbox"/> Refusal and withdrawal from participation in this clinical trial  | <input type="checkbox"/> Accredited Clinical Research Review Committee                             |
| <input type="checkbox"/> If you decide to discontinue participation in this clinical trial |                                                                                                    |

[Signature of Parents]

In participating in this clinical trial, because I have been fully informed of the above matters, received a written explanation, and understood the contents, I agree to participate in this clinical trial. It is confirmed that this consent can be withdrawn at any time.

Date of consent: \_\_\_\_\_ / \_\_\_\_\_ / \_\_\_\_\_ Patient's name: \_\_\_\_\_

Parent name: \_\_\_\_\_ Relationship: \_\_\_\_\_

Parent name: \_\_\_\_\_ Relationship: \_\_\_\_\_

[Signature of physician/research collaborator]

I (We) have fully explained the clinical trial regarding the above-mentioned explanatory notes.

Date of explanation: \_\_\_\_\_ / \_\_\_\_\_ / \_\_\_\_\_ Affiliation: \_\_\_\_\_ Name: \_\_\_\_\_

Date of explanation: \_\_\_\_\_ / \_\_\_\_\_ / \_\_\_\_\_ Affiliation: \_\_\_\_\_ Name: \_\_\_\_\_
